# Supplementary material for: Characterization of the Mode of Action of Aurodox, a Type III Secretion System Inhibitor from Streptomyces goldiniensis
Source: PubMed Central journal article supplement (PMC6346137; doi:10.1128/iai.00595-18), 2019-01-24
Supplement: 117c39064df564581bb917f8d4a3cbab_IAI.00595-18-s0001.pdf [file 117c39064df564581bb917f8d4a3cbab_IAI.00595-18-s0001.pdf]

**Table S1: Strains used in this study**

---

| <b>Strain</b>                  | <b>Description</b>                                                                         | <b>Source</b> |
|--------------------------------|--------------------------------------------------------------------------------------------|---------------|
| <b>TUV 93-0</b>                | Shiga-toxin negative variant of EHEC O157:H7, derived from EDL933 outbreak strain          | (1)           |
| <b>E2348/69</b>                | Wild type EPEC O127:H6                                                                     | (2)           |
| <b><math>\Delta</math>escC</b> | $\Delta$ escC derivative of EPEC E2348/69                                                  | (2)           |
| <b><math>\Delta</math>escF</b> | $\Delta$ escF derivative of EPEC E2348/69                                                  | (2)           |
| <b><math>\Delta</math>escR</b> | $\Delta$ escR derivative of EPEC E2348/69                                                  | (2)           |
| <b><math>\Delta</math>escV</b> | $\Delta$ escV derivative of EPEC E2348/69                                                  | (2)           |
| <b>ICC168</b>                  | Wild type <i>Citrobacter rodentium</i>                                                     | (2)           |
| <b>DBS100</b>                  | DBS100 lysogenized with $\Phi$ 1720a02 $\Delta$ Rz::cat $\Delta$ stx2dactAB::kan, CmR, KmR | (3)           |

---

**Table S2: Plasmids used in this study**

---

| <b>Plasmid</b>   | <b>Description</b>                                                                          | <b>Source</b> |
|------------------|---------------------------------------------------------------------------------------------|---------------|
| pAJR70           | Empty plasmid vector, Chloramphenicol resistance marker.                                    | (4)           |
| <i>pler-gfp</i>  | <i>ler</i> promoter fused to gfp. Chloramphenicol resistance marker.                        | (4)           |
| <i>prpsM-gfp</i> | <i>rpsM</i> promoter fused to gfp. Chloramphenicol resistance marker.                       | (4)           |
| pVS45            | Plasmid encoding <i>ler</i> with arabinose inducible promoter. Ampicillin resistance marker | (5)           |
| <i>precA-gfp</i> | <i>recA</i> fused to gfp. Chloramphenicol resistance marker.                                | (6)           |
| <i>ptir-gfp</i>  | <i>tir</i> fused to gfp. Chloramphenicol resistance marker                                  |               |

---

**Table S3: MASCOT results for EPEC secreted protein bands**

---

| <b>Protein</b> | <b>Mass</b> | <b>MASCOT score</b> | <b>Matches</b> |
|----------------|-------------|---------------------|----------------|
| <b>EspB</b>    | 31564       | 498                 | 9/9            |
| <b>EspD</b>    | 39033       | 1204                | 21/21          |
| <b>Tir</b>     | 57954       | 2116                | 43/43          |

---

**Table S4: MASCOT results for EHEC secreted protein bands**

---

| <b>Protein</b> | <b>Mass</b> | <b>MASCOT score</b> | <b>Matches</b> |
|----------------|-------------|---------------------|----------------|
| <b>EspB</b>    | 31564       | 648                 | 11/11          |
| <b>EspD</b>    | 39033       | 874                 | 14/14          |
| <b>Tir</b>     | 57954       | 2336                | 50/50          |
| <b>EspP</b>    | 135881      | 2655                | 47/47          |

---

**Table S5: MASCOT result for *C. rodentium* secreted protein bands**

| <b>Protein</b> | <b>Mass</b> | <b>MASCOT score</b> | <b>Matches</b> |
|----------------|-------------|---------------------|----------------|
| <b>EspB</b>    | 31564       | -                   | -              |
| <b>EspD</b>    | 39033       | -                   | -              |
| <b>Tir</b>     | 57954       | 377                 | 6/6            |

**Table S6: Chromosomal EHEC TUV93-0 genes downregulated in the presence of Aurodox.**

| <b>Gene</b> | <b>Fold Change</b> | <b>P Value</b> |
|-------------|--------------------|----------------|
| espH        | -1.51              | 0.04           |
| metE        | -1.51              | 0.01           |
| ydgA        | -1.52              | 0.00827        |
| Z2386       | -1.53              | 0.0021         |
| escJ        | -1.53              | 0.03           |
| rpoE        | -1.54              | 0.000591       |
| Z2387       | -1.55              | 0.00607        |
| adhE        | -1.56              | 0.000144       |
| yeaD        | -1.6               | 0.000375       |
| sepZ        | -1.6               | 0.0019         |
| espF        | -1.61              | 0.00231        |
| yhck        | -1.61              | 0.05           |
| spfA        | -1.61              | 0.00155        |
| xasA        | -1.63              | 0.04           |
| sepL        | -1.63              | 0.00117        |
| rrsE        | -1.63              | 0.01           |
| ptsG        | -1.66              | 0.00000407     |
| escI        | -1.66              | 0.01           |
| mokP        | -1.67              | 0.01           |
| abgT        | -1.68              | 0.04           |
| escN        | -1.69              | 0.0000174      |
| cesD        | -1.7               | 0.000775       |
| espJ        | -1.71              | 0.000591       |
| rrsD        | -1.71              | 0.006          |
| sepQ        | -1.72              | 0.0000902      |
| escF        | -1.72              | 0.00782        |
| rrsB        | -1.74              | 0.00216        |
| map         | -1.74              | 0.000582       |
| tkkB        | -1.76              | 0.00121        |
| lifA        | -1.77              | 0.03           |
| tir         | -1.78              | 0.00000692     |
| osmC        | -1.79              | 0.0000687      |
| escC        | -1.8               | 0.0000001      |
| espX        | -1.81              | 0.00149        |
| pyrI        | -1.82              | 0.00268        |
| cesF        | -1.82              | 0.00867        |
| ysgA        | -1.83              | 0.000126       |
| poxB        | -1.84              | 0.04           |
| espL2       | -1.87              | 0.00881        |
| nleB        | -1.89              | 0.02           |
| orf29       | -1.89              | 0.000106       |
| rrfF        | -1.93              | 0.00827        |

---

|       |        |             |
|-------|--------|-------------|
| katE  | -1.93  | 0.04        |
| espW  | -1.99  | 4.08E-09    |
| rrfG  | -2     | 0.00206     |
| cesT  | -2.02  | 4.63E-08    |
| Z2063 | -2.02  | 0.0000147   |
| escE  | -2.03  | 0.000533    |
| Z5138 | -2.04  | 0.0000436   |
| yjcO  | -2.13  | 0.00135     |
| cesD2 | -2.13  | 1.01E-11    |
| manZ  | -2.16  | 8.56E-13    |
| espD  | -2.18  | 5.84E-08    |
| nleA  | -2.2   | 0.0000411   |
| manY  | -2.21  | 1.69E-14    |
| manX  | -2.29  | 4.59E-19    |
| espA  | -2.32  | 4.26E-10    |
| eae   | -2.34  | 0           |
| rorf1 | -2.34  | 0.02        |
| espB  | -2.36  | 5.06E-10    |
| fruA  | -2.44  | 0.00000123  |
| grlA  | -2.45  | 0.00000008  |
| rcaA  | -2.47  | 1.67E-08    |
| rrlG  | -2.53  | 0.00527     |
| yneB  | -2.54  | 0.0047      |
| ssrS  | -2.57  | 0.000106    |
| cpsB  | -2.74  | 0.00827     |
| ffs   | -2.8   | 0.03        |
| wzc   | -2.97  | 0.03        |
| fruB  | -3.07  | 0.0000147   |
| yghX  | -3.51  | 0.00607     |
| fruK  | -3.59  | 0.000538    |
| wcaH  | -3.8   | 0.04        |
| wcaG  | -3.83  | 0.000000108 |
| yjbE  | -3.93  | 0.04        |
| wcaD  | -3.94  | 0.000563    |
| wcaE  | -3.98  | 0.00704     |
| gmd   | -5.04  | 5.22E-16    |
| yebV  | -5.89  | 0.02        |
| wcaI  | -6.07  | 1.64E-08    |
| wcaC  | -10.12 | 0.01        |
| cpsG  | -12.12 | 0.00000259  |
| yjbF  | -43.7  | 0.00554     |

---

**Table S7: Genes upregulated in the presence of Aurodox**

| <b>Gene</b>  | <b>Fold Change</b> | <b>P value</b> |
|--------------|--------------------|----------------|
| <i>yheN</i>  | 1.51               | 0.00000166     |
| <i>Z2005</i> | 1.52               | 0.00000151     |
| <i>yafH</i>  | 1.53               | 0.00000191     |
| <i>pyrF</i>  | 1.53               | 0.00000211     |
| <i>yqiB</i>  | 1.53               | 0.00000142     |
| <i>trmA</i>  | 1.57               | 0.00000173     |
| <i>yegQ</i>  | 1.58               | 0.00000195     |
| <i>Z4370</i> | 1.58               | 0.00000284     |
| <i>sapA</i>  | 1.59               | 0.00000169     |
| <i>hemA</i>  | 1.59               | 0.00000443     |
| <i>yfhJ</i>  | 1.6                | 0.00000159     |
| <i>folX</i>  | 1.6                | 0.00000145     |
| <i>gabP</i>  | 1.61               | 0.0000134      |
| <i>yfcl</i>  | 1.61               | 0.00000143     |
| <i>mdaA</i>  | 1.61               | 0.0000014      |
| <i>yliG</i>  | 1.61               | 0.00000227     |
| <i>stpA</i>  | 1.62               | 0.00000146     |
| <i>yhiW</i>  | 1.62               | 0.00000157     |
| <i>ycaD</i>  | 1.62               | 0.00000115     |
| <i>bcr</i>   | 1.63               | 0.00000205     |
| <i>terC</i>  | 1.63               | 0.00000125     |
| <i>ydeA</i>  | 1.65               | 0.00000243     |
| <i>yafS</i>  | 1.67               | 0.00000161     |
| <i>yccJ</i>  | 1.67               | 0.00000161     |
| <i>abc</i>   | 1.67               | 0.00000269     |
| <i>hypF</i>  | 1.68               | 0.00000127     |
| <i>pheA</i>  | 1.69               | 0.00000154     |
| <i>ygaF</i>  | 1.69               | 0.0000126      |
| <i>yfbS</i>  | 1.7                | 0.00000188     |
| <i>yfhE</i>  | 1.71               | 0.0000069      |
| <i>leuC</i>  | 1.71               | 0.00000764     |
| <i>pheP</i>  | 1.72               | 0.0000026      |
| <i>yedV</i>  | 1.72               | 0.00000183     |
| <i>leuB</i>  | 1.73               | 0.00000588     |
| <i>ycgN</i>  | 1.73               | 0.00000112     |
| <i>ydcP</i>  | 1.75               | 0.00000323     |
| <i>fadB</i>  | 1.75               | 0.00000154     |
| <i>nrdD</i>  | 1.76               | 0.000000974    |
| <i>ygaT</i>  | 1.77               | 0.0000152      |
| <i>sodB</i>  | 1.78               | 0.00000114     |
| <i>fimB</i>  | 1.78               | 0.00000164     |
| <i>trpC</i>  | 1.78               | 0.00000712     |
| <i>bigA</i>  | 1.8                | 0.00000249     |
| <i>prpE</i>  | 1.81               | 0.00000134     |



---

|               |      |             |
|---------------|------|-------------|
| <i>yieP</i>   | 1.81 | 0.00000165  |
| <i>leuD</i>   | 1.81 | 0.00000392  |
| Z2806         | 1.82 | 0.0000014   |
| <i>yfcD</i>   | 1.83 | 0.00000279  |
| <i>yciA</i>   | 1.84 | 0.00000161  |
| <i>narQ</i>   | 1.85 | 0.00000125  |
| <i>acrD</i>   | 1.85 | 0.00000109  |
| <i>ubiX</i>   | 1.85 | 0.00000217  |
| <i>leuA</i>   | 1.89 | 0.00000923  |
| Z4832         | 1.91 | 0.00000209  |
| Z2491         | 1.96 | 0.0000022   |
| <i>espR</i>   | 1.99 | 0.000000894 |
| <i>yjhS</i>   | 2    | 0.00000103  |
| <i>ycdZ</i>   | 2.02 | 0.00000163  |
| <i>ycfS</i>   | 2.03 | 0.00000321  |
| Z4833         | 2.11 | 0.00000233  |
| <i>yadB</i>   | 2.12 | 0.00000143  |
| <i>yhfC</i>   | 2.18 | 0.000005    |
| <i>trpB</i>   | 2.25 | 0.0000161   |
| <i>trpA</i>   | 2.27 | 0.0000104   |
| <i>phoE</i>   | 2.37 | 0.000000808 |
| Z0701         | 2.39 | 0.000000646 |
| <i>ykgF</i>   | 2.4  | 0.000000647 |
| <i>frdB</i>   | 2.43 | 0.000000755 |
| <i>metF</i>   | 2.59 | 0.00000174  |
| <i>yjcZ</i>   | 2.63 | 0.000000653 |
| <i>torR</i>   | 2.65 | 0.000000871 |
| <i>ebgR</i>   | 2.9  | 0.00000124  |
| <i>yjiY</i>   | 2.96 | 0.00000328  |
| <i>aldH</i>   | 3    | 0.0000013   |
| <i>yafO</i>   | 3    | 0.00000055  |
| <i>yliF</i>   | 3    | 0.00000055  |
| <i>ymdF</i>   | 3.14 | 0.000000991 |
| <i>hcaR</i>   | 3.2  | 0.000000882 |
| Z3235         | 3.22 | 0.000000609 |
| Z1644         | 3.27 | 0.00000105  |
| <i>yfhH</i>   | 3.29 | 0.000000774 |
| <i>bssR</i>   | 3.39 | 0.00000172  |
| <i>mtr</i>    | 3.66 | 0.0000141   |
| <i>CII</i>    | 4.01 | 0.000000447 |
| <i>narJ</i>   | 4.19 | 0.000000679 |
| <i>ybiH</i>   | 4.93 | 0.00000108  |
| <i>trpE_1</i> | 5.23 | 0.00000223  |
| <i>dicB</i>   | 5.62 | 0.000000395 |
| <i>prpR</i>   | 5.62 | 0.000000395 |
| Z2986         | 5.63 | 0.000000397 |
| <i>trpD</i>   | 6.05 | 0.00000744  |
| <i>hycA</i>   | 6.27 | 0.000000452 |
| <i>yaeJ</i>   | 6.28 | 0.00000111  |
| Z4398         | 6.28 | 0.000000452 |

---

---

|              |       |             |
|--------------|-------|-------------|
| <i>yjgZ</i>  | 8.26  | 0.00000062  |
| <i>napC</i>  | 8.97  | 0.000000682 |
| <i>ydfZ</i>  | 9.64  | 0.000000739 |
| <i>torD</i>  | 10.09 | 0.00000025  |
| <i>torA</i>  | 13.4  | 0.0000104   |
| <i>sorA</i>  | 16.27 | 0.000000344 |
| <i>torC</i>  | 18.24 | 0.000000365 |
| <i>Z6041</i> | 18.81 | 0.000000401 |
| <i>cmtA</i>  | 18.84 | 0.000000402 |
| <i>ecpD</i>  | 33.8  | 0.000000739 |

---

**Figure S1: Effect of Aurodox on *ler* expression in EPEC.**

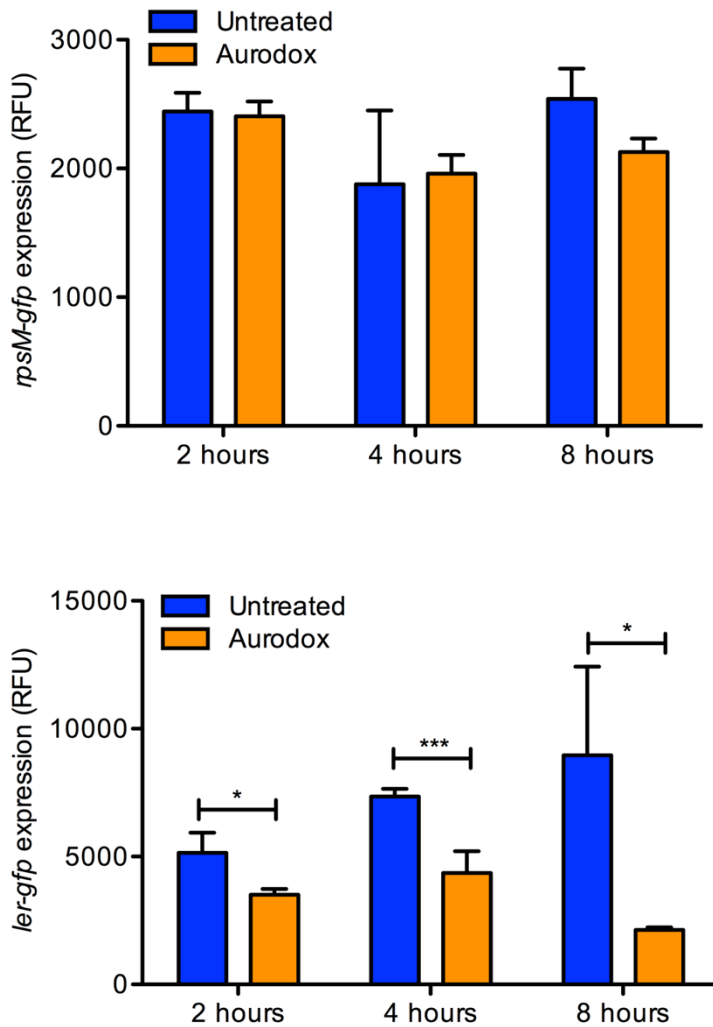

**Figure S1: Effect of Aurodox on expression of *ler* compared to housekeeping gene *rpsM* in EPEC.** EPEC transformed with *pler-gfp/prpsM-gfp* was cultured in the presence or absence of 6  $\mu$ M Aurodox as indicated,  $n = 3$ . Error bars plotted are equivalent to the standard deviation from the mean. Normalised relative fluorescence values (RFU) were calculated by dividing the raw fluorescence value by the Optical Density (600nm). No changes in RpsM expression were statistically significant. Reduction in *ler* expression at all time points was statistically significant ( $P = 0.02, 0.004$  and  $0.025$  respectively).

## Supplementary References

1. Campellone KG, Robbins D, Leong JM. 2004. EspFU is a translocated EHEC effector that interacts with Tir and N-WASP and promotes Nck-independent actin assembly. *Dev Cell* 7:217-228.
2. Deng W, Puente JL, Gruenheid S, Li Y, Vallance BA, Vázquez A, Barba J, Ibarra JA, O’Donnell P, Metalnikov P, Ashman K, Lee S, Goode D, Pawson T, Finlay BB. 2004. Dissecting virulence: Systematic and functional analyses of a pathogenicity island. *Proc Natl Acad Sci U S A* 101:3597-3602.
3. Mallick EM, McBee ME, Vanguri VK, Melton-Celsa AR, Schlieper K, Karalius BJ, O’Brien AD, Buttermont JR, Leong JM, Schauer DB. 2012. A novel murine infection model for Shiga toxin-producing *Escherichia coli*. *J Clin Invest* 122:4012-4024.
4. J. RA, W. NS, J. SK, M. YH, A. DT, Matthew O, J. MI, Megan P, J. WM, E. SDG, L. GD. 2004. Co-ordinate single-cell expression of LEE4- and LEE5-encoded proteins of *Escherichia coli* O157:H7. *Mol Microbiol* 54:337-352.
5. Vanessa S, L. MJ, M. DR, Gad F, Adam CJ, William N, B. KJ. 2002. Activation of enteropathogenic *Escherichia coli* (EPEC) LEE2 and LEE3 operons by Ler. *Mol Microbiol* 38:781-793.
6. Zaslaver A, Bren A, Ronen M, Itzkovitz S, Kikoin I, Shavit S, Liebermeister W, Surette MG, Alon U. 2006. A comprehensive library of fluorescent transcriptional reporters for *Escherichia coli*. *Nat Methods* 3:623-628.
